# Supplementary material for: Preparation and dye adsorption properties of an oxygen-rich porous organic polymer
Source: Royal Society of Chemistry journal article supplement (doi:10.1039/d1ra01382c), 2021-01-01
Supplement: d1ra01382c1.pdf [file d1ra01382c1.pdf]

## Electronic Supplementary Information

### Preparation and dye adsorption property of an oxygen-rich porous organic polymer

Guang Yang,<sup>a</sup> Huimin Gao,<sup>a</sup> and Qingyin Li <sup>a</sup> and Shijie Ren<sup>\*a</sup>

<sup>a</sup> College of Polymer Science and Engineering, State Key Laboratory of Polymer Materials Engineering, Sichuan University, Chengdu, 610065, P. R. China.  
E-mail address: rensj@scu.edu.cn

#### Contents

**Fig. S1** NMR spectrum of 1,3,5-triethynylbenzene.

**Scheme S1** Synthetic route of polymer POP-B.

**Fig. S2** Fourier transform infrared (FT-IR) spectra.

**Fig. S3** Solid-state <sup>13</sup>C CP-MAS NMR spectrum of POP-O.

**Fig. S4** Thermogravimetric analysis (TGA) analysis of POP-O.

**Fig. S5** PXRD pattern of POP-O.

**Fig. S6** Water contact angle tests of (a) POP-O and (b) POP-B.

**Fig. S7** The particle size and distribution of polymers in water.

**Table S1** The adsorption capacity of Rhodamine B by polymers POP-O and POP-B at different times.

**Table S2** The adsorption capacity of Rhodamine B by polymer POP-O at different concentration.

**Fig. S8.** Langmuir (a) and Freundlich (b) isotherms of Rh B adsorption by polymer POP-O.

**Table S3.** Fitting parameters of Langmuir model and Freundlich model adsorption isotherms of POP-O on Rh B.

**Fig. S9** Cartoon schematic diagram of the adsorption process.

**Fig. S10** Fitting curves of pseudo-first-order (a) and pseudo-second-order (b) kinetic equations.

**Table S4** Fitting parameters of pseudo-first-order and pseudo-second-order models of POP-O on Rh B.

**Fig. S11** SEM images of POP-O before (a) and after (b) recycling.

**Fig. S12** FT-IR spectra of POP-O before (red) and after (black) recycling.

**Fig. S13** PXRD patterns of POP-O before (red) and after (black) recycling.

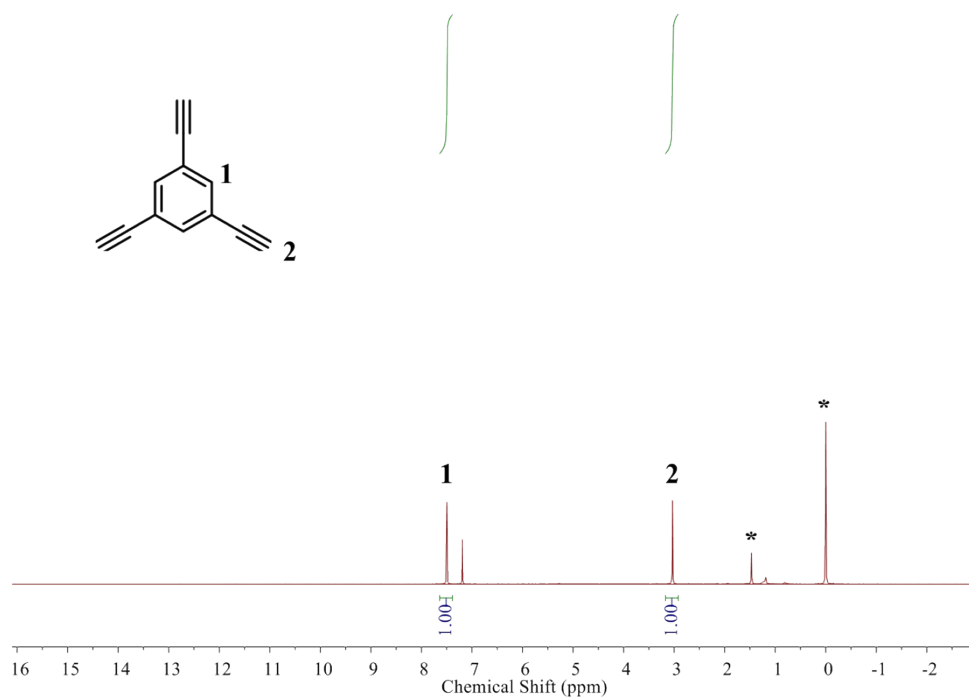

**Fig. S1** NMR spectrum of 1,3,5-triethynylbenzene.

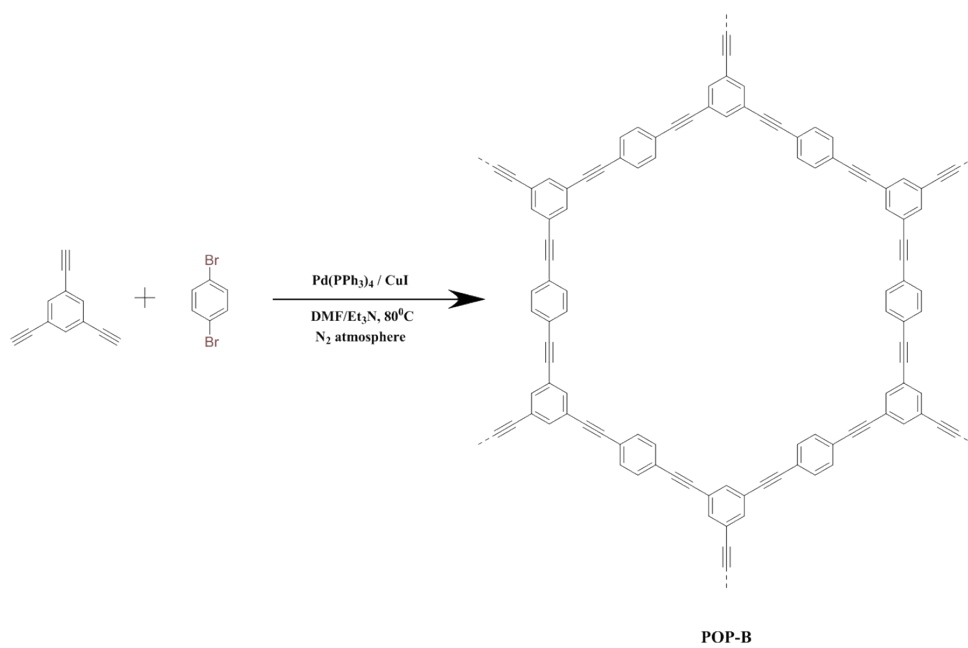

**Scheme S1** Synthetic route of polymer POP-B.

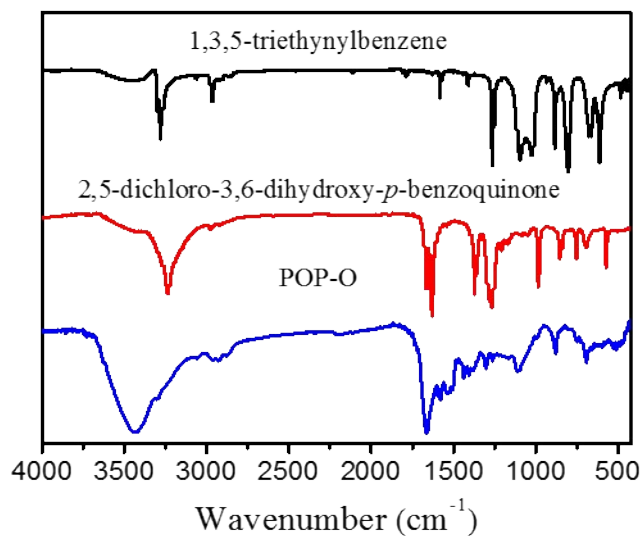

**Fig. S2** Fourier transform infrared (FT-IR) spectra of 1,3,5-triethynylbenzene, 2,5-dichloro-3,6-dihydroxy-*p*-benzoquinone and POP-O.

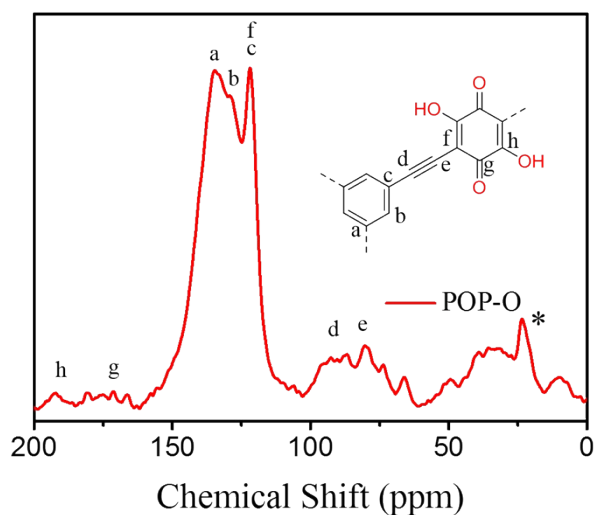

**Fig. S3** Solid-state <sup>13</sup>C CP-MAS NMR spectrum of POP-O (\* The characteristic broad peaks at 15 to 40 ppm may be caused by the *solvent adsorbed* in the pores of the polymer).

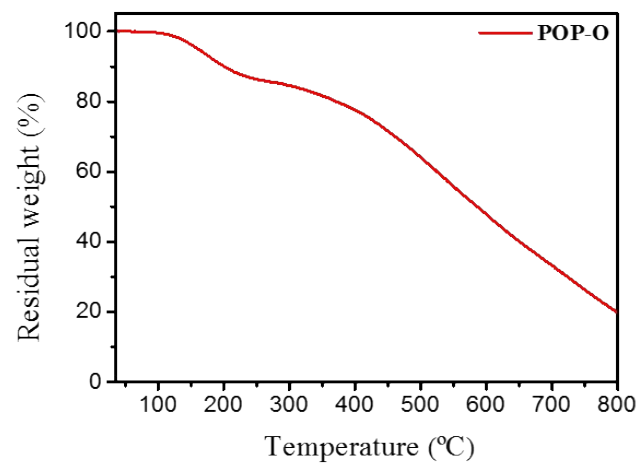

**Fig. S4** Thermogravimetric analysis (TGA) analysis of POP-O.

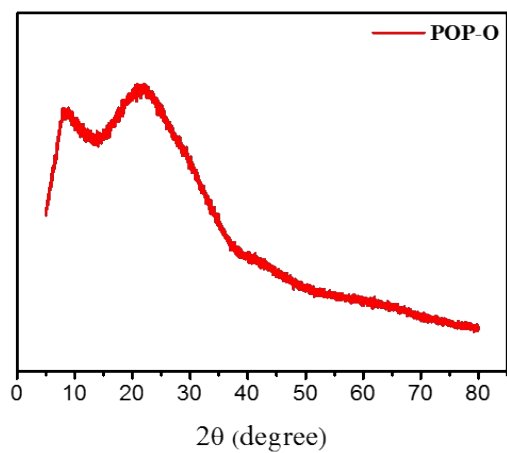

**Fig. S5** PXRD pattern of POP-O.

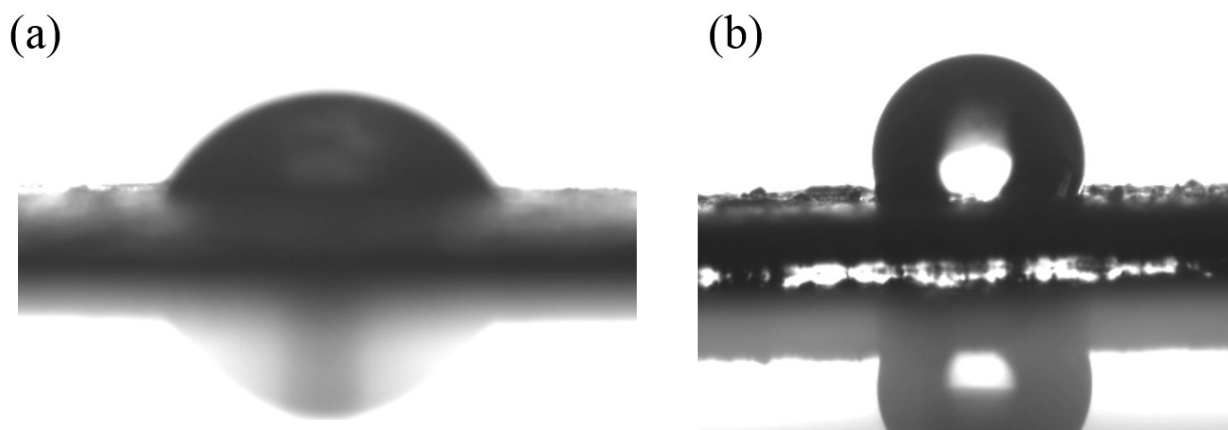

**Fig. S6** Water contact angle tests of (a) POP-O and (b) POP-B.

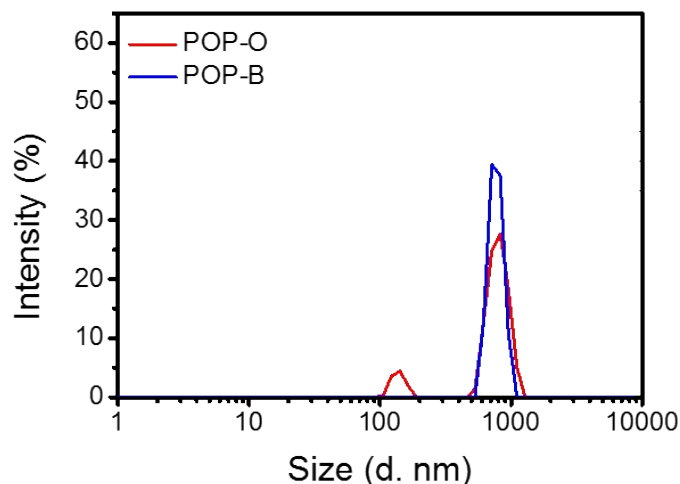

**Fig. S7** The particle size distribution of the polymers in water.

**Table S1** The adsorption capacity of Rhodamine B by polymers POP-O and POP-B at different times

| Time<br>(min) | Adsorption capacity<br>(mg g <sup>-1</sup> ) POP-O | Adsorption capacity<br>(mg g <sup>-1</sup> ) POP-B |
|---------------|----------------------------------------------------|----------------------------------------------------|
| 0             | 0                                                  | 0                                                  |
| 10            | 410                                                | 142                                                |
| 20            | 496                                                | 176                                                |
| 40            | 528                                                | 210                                                |
| 60            | 524                                                | 243                                                |
| 90            | 534                                                | 289                                                |
| 120           | 547                                                | 298                                                |
| 240           | 562                                                | 330                                                |
| 480           | 576                                                | 370                                                |
| 960           | 590                                                | 390                                                |

**Table S2** The adsorption capacity of Rhodamine B by polymer POP-O at different concentration

| Initial concentration<br>(mg g <sup>-1</sup> ) | Adsorption capacity<br>(mg g <sup>-1</sup> ) of POP-O |
|------------------------------------------------|-------------------------------------------------------|
| 214.48165                                      | 407.066                                               |
| 276.66928                                      | 473.259                                               |
| 328.74324                                      | 520.104                                               |
| 481.23409                                      | 590.262                                               |
| 498.65915                                      | 617.262                                               |
| 546.04527                                      | 650.254                                               |
| 663.06672                                      | 686.253                                               |

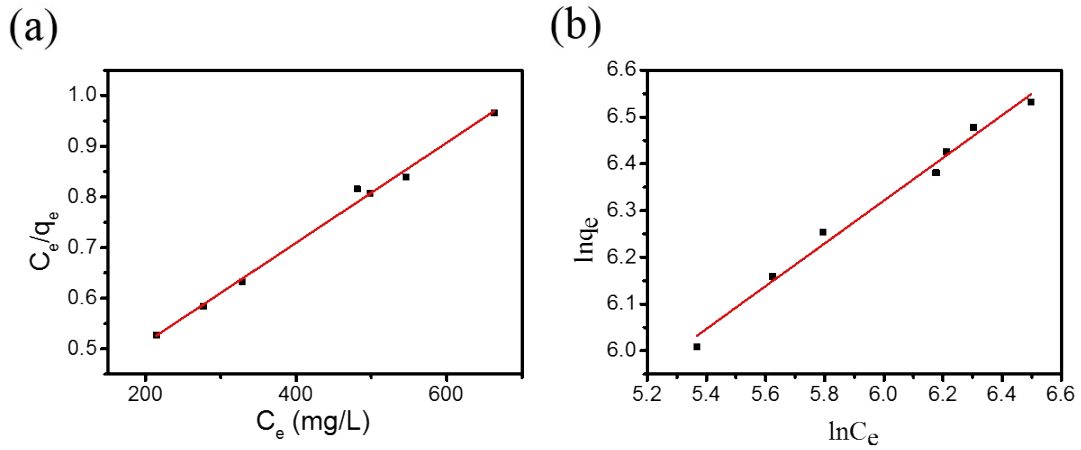

**Fig. S8** Langmuir (a) and Freundlich (b) isotherms of Rh B adsorption by polymer POP-O.

**Table S3** Fitting parameters of Langmuir model and Freundlich model adsorption isotherms of POP-O on Rh B

| Langmuir                    |                            |         | Freundlich               |       |         |
|-----------------------------|----------------------------|---------|--------------------------|-------|---------|
| $q_m$ (mg g <sup>-1</sup> ) | $K_L$ (L g <sup>-1</sup> ) | $R^2$   | $K_F$ mg g <sup>-1</sup> | n     | $R^2$   |
| 1012                        | 0.9949                     | 0.99272 | 35.826                   | 2.187 | 0.98591 |

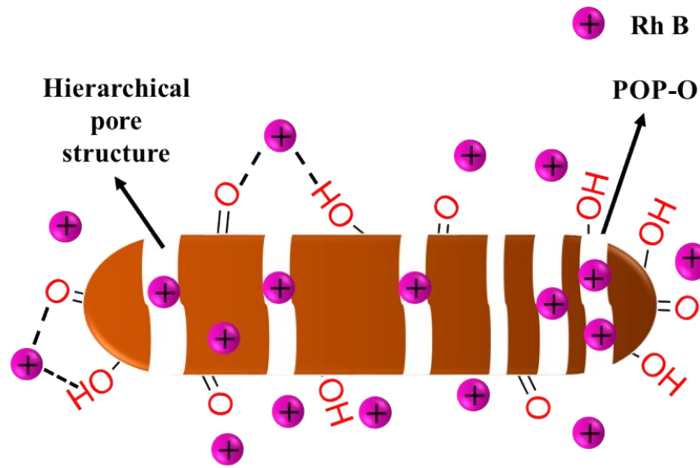

**Fig. S9** Cartoon schematic diagram of the adsorption process.

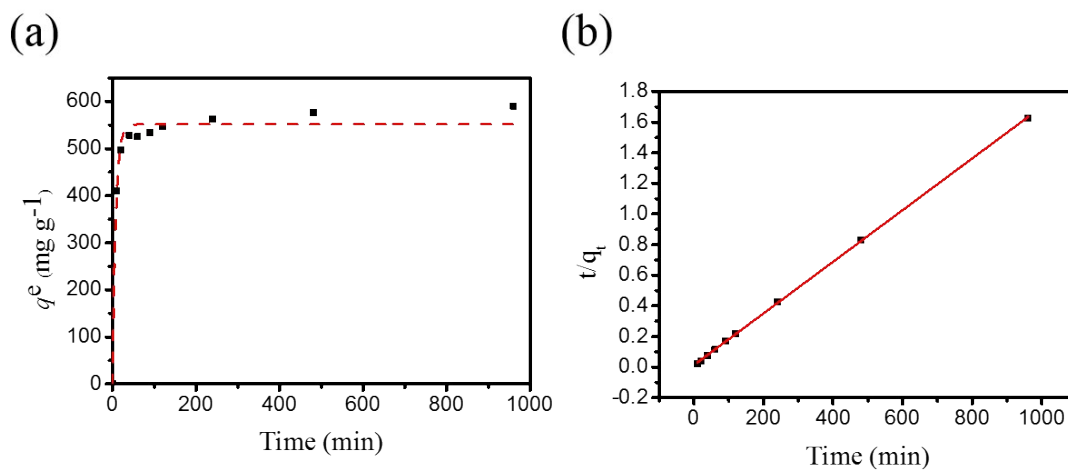

**Fig. S10** Fitting curves of pseudo-first-order (a) and pseudo-second-order (b) kinetic equations for the adsorption of Rh B by POP-O.

**Table S4** Fitting parameters of pseudo-first-order and pseudo-second-order models of POP-O on Rh B

| Polymer | Model               | $K$        | $q_{e \text{ cal.}} \text{ (mg g}^{-1}\text{)}$ | $R^2$   | $q_{e \text{ exp.}} \text{ (mg g}^{-1}\text{)}$ |
|---------|---------------------|------------|-------------------------------------------------|---------|-------------------------------------------------|
| POP-O   | Pseudo-first-order  | 0.12946    | 551                                             | 0.98396 | 592                                             |
|         | Pseudo-second-order | 0.00002168 | 591.7                                           | 0.99983 | 592                                             |

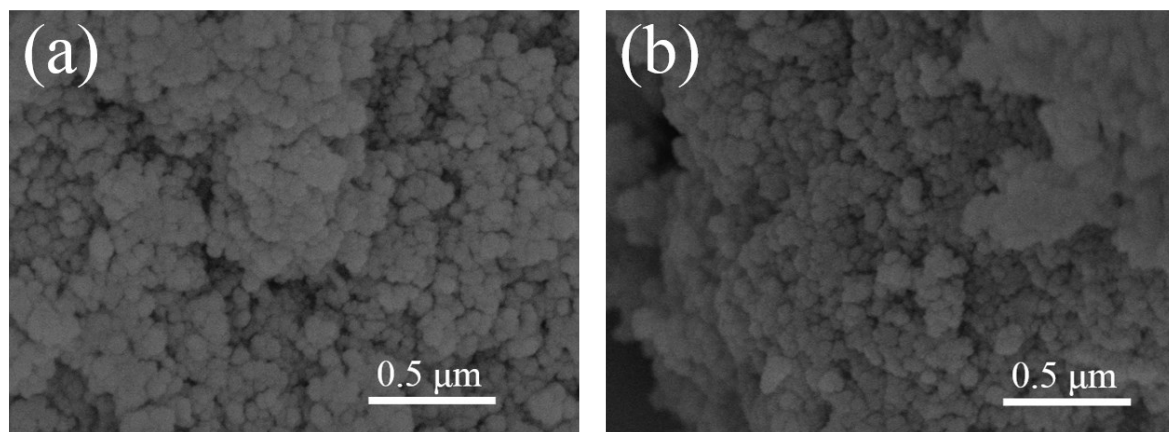

**Fig. S11** SEM images of POP-O (a) before and (b) after recycling.

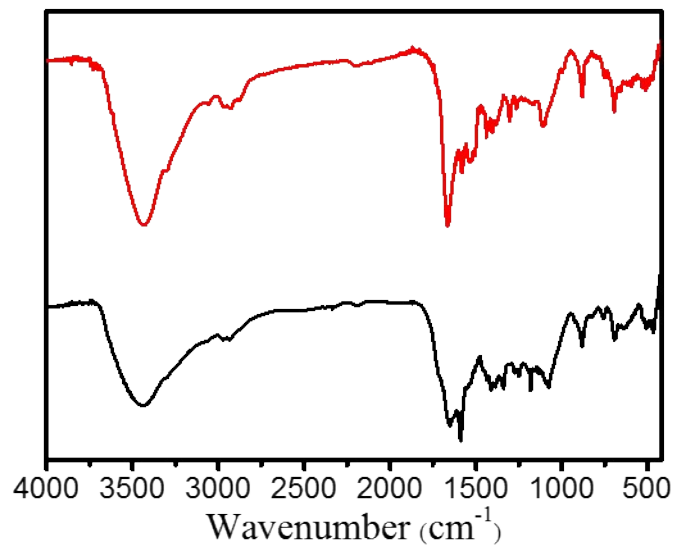

**Fig. S12** FT-IR spectra of POP-O before (red) and after (black) recycling.

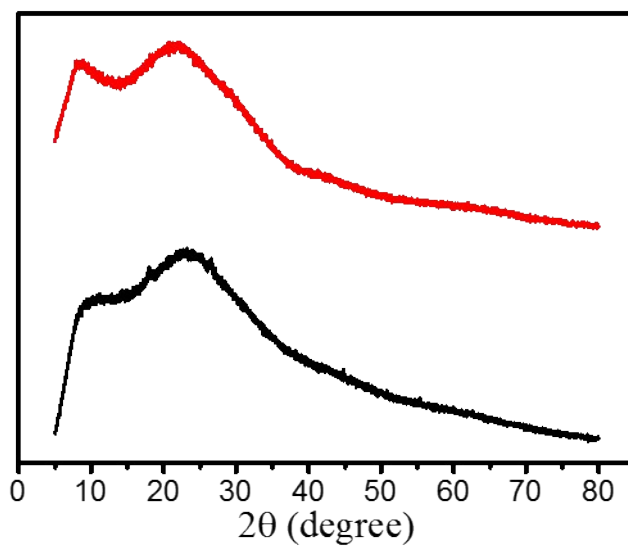

**Fig. S13** PXRD patterns of POP-O before (red) and after (black) recycling.
